# Supplementary material
Source: PubMed Central journal article supplement (PMC7097079)
Supplement: 41573_2018_BFnrd2017162_MOESM124_ESM.pdf [file 41573_2018_BFnrd2017162_MOESM124_ESM.pdf]

**Supplementary Table 1. Selection of host-directed therapies for chronic HBV, HCV and HIV infections.**

| Infection           | Strategy                                                                          | Agent                                                                                                                  | Status of development                                                                                                                                                                                                                                                                        | Ref  |
|---------------------|-----------------------------------------------------------------------------------|------------------------------------------------------------------------------------------------------------------------|----------------------------------------------------------------------------------------------------------------------------------------------------------------------------------------------------------------------------------------------------------------------------------------------|------|
| Chronic hepatitis B | Blocking virus entry by targeting NTCP                                            | myrcludex B (peptide derived from HBV large surface glycoprotein)                                                      | Phase Ib/IIa study of patients with chronic HBV – HDV co-infection; orphan drug status by the EMA and the FDA                                                                                                                                                                                | 1,2  |
|                     | Enhancing the immune response by treatment with IFN- $\alpha$                     | Peg-conjugated IFN $\alpha$ -2a (Pegasys); IFN $\alpha$ -2b (Intron A)                                                 | PegIFN $\alpha$ -2a for treatment of adult patients with HBeAg positive or negative chronic hepatitis B, compensated liver disease, liver inflammation and evidence of viral replication; Intron A for chronic hepatitis B in patients 1 year of age or older with compensated liver disease | 3-7  |
|                     | Therapeutic vaccination to enhance cellular immunity and cell-based immunotherapy | HBsAg complexed with HBIG                                                                                              | Phase IIb trial: HBsAg seroconversion only in group with highest vaccine dose, but not statistically significant                                                                                                                                                                             | 8    |
|                     |                                                                                   | Multi-epitope vaccines; combination of vaccine with immune check point inhibitors; protein-prime MVA-boost vaccination | Preclinical stages                                                                                                                                                                                                                                                                           | 9,10 |
|                     | DNA-based genetic vaccines (with                                                  | Proof-of-concept study                                                                                                 | 11,12                                                                                                                                                                                                                                                                                        |      |

|                     |                                                                                                |                                                                                                                                                                                     |                                                                                                                                                                                                      |                |
|---------------------|------------------------------------------------------------------------------------------------|-------------------------------------------------------------------------------------------------------------------------------------------------------------------------------------|------------------------------------------------------------------------------------------------------------------------------------------------------------------------------------------------------|----------------|
|                     |                                                                                                | nucleoside analogue)                                                                                                                                                                |                                                                                                                                                                                                      |                |
|                     |                                                                                                | CAR-redirected T cells                                                                                                                                                              | Preclinical development                                                                                                                                                                              | 13             |
| Chronic hepatitis C | Enhancing the immune response by treatment with IFNs                                           | IFN alfacon-1 (Infergen); IFN $\alpha$ -2b (Intron A); IFN $\alpha$ -2a (Roferon); Peg-conjugated IFN $\alpha$ -2a (Pegasys); PegIFN $\alpha$ -2b (PegIntron); PegIFN- $\lambda$ 1a | Approved IFN- $\alpha$ types and formulations, often in combination with ribavirin; PegIFN- $\lambda$ 1a: phase IIb study                                                                            | 14,15          |
|                     | Inhibiting viral replication by sequestering cyclophilin A (CypA)                              | Non-immunosuppressive derivatives of cyclosporine A (CsA) such as alisporivir, NIM811, SCY-635                                                                                      | Clinical studies of alisporivir with a total patient population of ~1.800 patients; exploratory phase II and 2 trials for SCY-635 and NIM811; no further clinical studies due to the success of DAAs | 16,17<br>18-20 |
|                     | Inhibiting viral replication by sequestering cellular miR-122                                  | Antagomirs: antisense oligonucleotides to miR-122                                                                                                                                   | Preclinical studies with knock-out mice revealed tumor suppressor function for miR-122; only one clinical candidate in further development                                                           | 21-23          |
| HIV-1               | Blocking virus entry by antagonizing the co-receptor CCR5; additional immunological benefit by | Maraviroc (Selzentry <sup>®</sup> or Celsentri <sup>®</sup> )                                                                                                                       | Approved                                                                                                                                                                                             | 24             |

|  |                                                         |                                                                                |                                                                                                                                |       |
|--|---------------------------------------------------------|--------------------------------------------------------------------------------|--------------------------------------------------------------------------------------------------------------------------------|-------|
|  | increasing the levels of CD4+ and CD8+ T cells          |                                                                                |                                                                                                                                |       |
|  | Enhancing immune response by treatment with IFNs        | PegIFN $\alpha$ -2a                                                            | Phase II clinical trial of HIV-1 monoinfected patients                                                                         | 25    |
|  | Eliminate reactivated cells in the latent HIV reservoir | Acitretin (retinoic acid derivate)                                             | <i>Ex vivo</i> studies                                                                                                         | 26    |
|  | Cell-based immunotherapy                                | CAR-redirected T cells: e.g. CD4 $\zeta$                                       | Phase II randomized study; preclinical study of CAR-engrafted T-cells co-expressing shRNAs targeting CCR5 and the HIV-1 genome | 27-33 |
|  | Therapeutic vaccines                                    | Serial immunization with MVA and Fowlpox virus expressing multiple HIV-1 genes | Phase I clinical trial in young adults on effective HAART                                                                      | 34    |

## References

- 1 Blank, A. *et al.* First-in-human application of the novel hepatitis B and hepatitis D virus entry inhibitor myrcludex B. *J Hepatol* **65**, 483-489, doi:10.1016/j.jhep.2016.04.013 (2016).
- 2 Bogomolov, P. *et al.* Treatment of chronic hepatitis D with the entry inhibitor myrcludex B: First results of a phase Ib/IIa study. *J Hepatol* **65**, 490-498, doi:10.1016/j.jhep.2016.04.016 (2016).
- 3 de Niet, A. *et al.* Restoration of T cell function in chronic hepatitis B patients upon treatment with interferon based combination therapy. *J Hepatol* **64**, 539-546, doi:10.1016/j.jhep.2015.10.013 (2016).
- 4 Marcellin, P. *et al.* Combination of Tenofovir Disoproxil Fumarate and Peginterferon alpha-2a Increases Loss of Hepatitis B Surface Antigen in Patients With Chronic Hepatitis B. *Gastroenterology* **150**, 134-144.e110, doi:10.1053/j.gastro.2015.09.043 (2016).
- 5 Mialhes, P. *et al.* Role of a 48-week pegylated interferon therapy in hepatitis B e antigen positive HIV-co-infected patients on cART including tenofovir: EMVIPEG study. *J Hepatol* **61**, 761-769, doi:10.1016/j.jhep.2014.05.030 (2014).
- 6 Terrault, N. A. *et al.* AASLD guidelines for treatment of chronic hepatitis B. *Hepatology (Baltimore, Md.)* **63**, 261-283, doi:10.1002/hep.28156 (2016).
- 7 WHO. Guidelines Approved by the Guidelines Review Committee. In: *Guidelines for the Prevention, Care and Treatment of Persons with Chronic Hepatitis B Infection*. World Health Organization (2015). ([www.who.int/hiv/pub/hepatitis/hepatitis-b-guidelines/en/](http://www.who.int/hiv/pub/hepatitis/hepatitis-b-guidelines/en/))
- 8 Xu, D. Z. *et al.* A randomized controlled phase IIb trial of antigen-antibody immunogenic complex therapeutic vaccine in chronic hepatitis B patients. *PLoS one* **3**, e2565, doi:10.1371/journal.pone.0002565 (2008).
- 9 Backes, S. *et al.* Protein-prime/modified vaccinia virus Ankara vector-boost vaccination overcomes tolerance in high-antigenemic HBV-transgenic mice. *Vaccine* **34**, 923-932, doi:10.1016/j.vaccine.2015.12.060 (2016).
- 10 Boni, C. *et al.* Characterization of hepatitis B virus (HBV)-specific T-cell dysfunction in chronic HBV infection. *J Virol* **81**, 4215-4225, doi:10.1128/jvi.02844-06 (2007).
- 11 Im, S. J., Yang, S. H., Yoon, S. K. & Sung, Y. C. Increase of Plasma IL-12/p40 Ratio Induced by the Combined Therapy of DNA Vaccine and Lamivudine Correlates with Sustained Viremia Control in CHB Carriers. *Immune Netw* **9**, 20-26, doi:10.4110/in.2009.9.1.20 (2009).
- 12 Yang, S. H. *et al.* Correlation of antiviral T-cell responses with suppression of viral rebound in chronic hepatitis B carriers: a proof-of-concept study. *Gene Ther* **13**, 1110-1117, doi:10.1038/sj.gt.3302751 (2006).
- 13 Krebs, K. *et al.* T cells expressing a chimeric antigen receptor that binds hepatitis B virus envelope proteins control virus replication in mice. *Gastroenterology* **145**, 456-465, doi:10.1053/j.gastro.2013.04.047 (2013).
- 14 Heim, M. H. 25 years of interferon-based treatment of chronic hepatitis C: an epoch coming to an end. *Nat Rev Immunol* **13**, 535-542, doi:10.1038/nri3463 (2013).
- 15 Muir, A. J. *et al.* A randomized phase 2b study of peginterferon lambda-1a for the treatment of chronic HCV infection. *J Hepatol* **61**, 1238-1246, doi:10.1016/j.jhep.2014.07.022 (2014).
- 16 Flisiak, R. *et al.* The Cyclophilin Inhibitor Debio 025 Combined with PEG IFN alpha 2a Significantly Reduces Viral Load in Treatment-Naive Hepatitis C Patients. *Hepatology (Baltimore, Md.)* **49**, 1460-1468, doi:10.1002/hep.22835 (2009).
- 17 Hopkins, S. *et al.* The cyclophilin inhibitor SCY-635 suppresses viral replication and induces endogenous interferons in patients with chronic HCV genotype 1 infection. *J Hepatol* **57**, 47-54 (2012).
- 18 Flisiak, R. *et al.* The cyclophilin inhibitor Debio-025 shows potent anti-hepatitis C effect in patients coinfecting with hepatitis C and human immunodeficiency virus. *Hepatology (Baltimore, Md.)* **47**, 817-826, doi:10.1002/hep.22131 (2008).
- 19 Hopkins, S. & Gallay, P. Cyclophilin inhibitors: an emerging class of therapeutics for the treatment of chronic hepatitis C infection. *Viruses* **4**, 2558-2577, doi:10.3390/v4112558 (2012).

- 20 Lawitz, E. *et al.* Safety, pharmacokinetics, and antiviral activity of the cyclophilin inhibitor NIM811 alone or in combination with pegylated interferon in HCV-infected patients receiving 14 days of therapy. *Antiviral Res* **89**, 238-245, doi:10.1016/j.antiviral.2011.01.003 (2011).
- 21 Hsu, S. H. *et al.* Essential metabolic, anti-inflammatory, and anti-tumorigenic functions of miR-122 in liver. *J Clin Invest* **122**, 2871-2883, doi:10.1172/jci63539 (2012).
- 22 Tsai, W. C. *et al.* MicroRNA-122 plays a critical role in liver homeostasis and hepatocarcinogenesis. *J Clin Invest* **122**, 2884-2897, doi:10.1172/jci63455 (2012).
- 23 van der Ree, M. H. *et al.* Long-term safety and efficacy of microRNA-targeted therapy in chronic hepatitis C patients. *Antiviral Res* **111**, 53-59, doi:10.1016/j.antiviral.2014.08.015 (2014).
- 24 Woollard, S. M. & Kanmogne, G. D. Maraviroc: a review of its use in HIV infection and beyond. *Drug Des Devel Ther* **9**, 5447-5468, doi:10.2147/DDDT.S90580 (2015).
- 25 Asmuth, D. M. *et al.* Safety, tolerability, and mechanisms of antiretroviral activity of pegylated interferon Alfa-2a in HIV-1-monoinfected participants: a phase II clinical trial. *J Infect Dis* **201**, 1686-1696, doi:10.1086/652420 (2010).
- 26 Li, P. *et al.* Stimulating the RIG-I pathway to kill cells in the latent HIV reservoir following viral reactivation. *Nat Med* **22**, 807-811, doi:10.1038/nm.4124 (2016).
- 27 Deeks, S. G. *et al.* A phase II randomized study of HIV-specific T-cell gene therapy in subjects with undetectable plasma viremia on combination antiretroviral therapy. *Mol Ther* **5**, 788-797, doi:10.1006/mthe.2002.0611 (2002).
- 28 Maus, M. V., Grupp, S. A., Porter, D. L. & June, C. H. Antibody-modified T cells: CARs take the front seat for hematologic malignancies. *Blood* **123**, 2625-2635, doi:10.1182/blood-2013-11-492231 (2014).
- 29 Mitsuyasu, R. T. *et al.* Prolonged survival and tissue trafficking following adoptive transfer of CD4zeta gene-modified autologous CD4(+) and CD8(+) T cells in human immunodeficiency virus -infected subjects. *Blood* **96**, 785-793 (2000).
- 30 Roberts, M. R. *et al.* Targeting of human immunodeficiency virus-infected cells by CD8+ T lymphocytes armed with universal T-cell receptors. *Blood* **84**, 2878-2889 (1994).
- 31 Scholler, J. *et al.* Decade-long safety and function of retroviral-modified chimeric antigen receptor T cells. *Sci Transl Med* **4**, 132ra153, doi:10.1126/scitranslmed.3003761 (2012).
- 32 Yang, O. O. *et al.* Lysis of HIV-1-infected cells and inhibition of viral replication by universal receptor T cells. *Proc Natl Acad Sci U S A*. **94**, 11478-11483 (1997).
- 33 Zhen, A. *et al.* HIV-specific Immunity Derived From Chimeric Antigen Receptor-engineered Stem Cells. *Mol Ther* **23**, 1358-1367, doi:10.1038/mt.2015.102 (2015).
- 34 Persaud, D. *et al.* Effect of therapeutic HIV recombinant poxvirus vaccines on the size of the resting CD4+ T-cell latent HIV reservoir. *AIDS (London, England)* **25**, 2227-2234, doi:10.1097/QAD.0b013e32834cdaba (2011).
