# Supplementary material
Source: PubMed Central journal article supplement (PMC7097079)
Supplement: 41573_2018_BFnrd2017162_MOESM125_ESM.pdf [file 41573_2018_BFnrd2017162_MOESM125_ESM.pdf]

**Supplementary Table 2. Host-directed therapeutics for tuberculosis.**

| Major target                        | General mechanism                                                            | TB specific effect                                                                  | Developmental stage as HDT for TB | Licensed/clinical development | Ref  |
|-------------------------------------|------------------------------------------------------------------------------|-------------------------------------------------------------------------------------|-----------------------------------|-------------------------------|------|
| <b>Small molecules (repurposed)</b> |                                                                              |                                                                                     |                                   |                               |      |
| <b>Autophagy</b>                    |                                                                              |                                                                                     |                                   |                               |      |
| Metformin                           | Inhibition of mitochondrial respiratory chain, modulation of protein kinases | Improved killing of Mtb via ROI, phagolysosome fusion, autophagy                    | Preclinical                       | Diabetes (licensed)           | 1    |
| Carbamazepine                       | Sodium channel modulator                                                     | Mtb killing through autophagy                                                       | Preclinical                       | Anti-convulsant (licensed)    | 2    |
| Valproic acid                       | Sodium channel and histone deacetylase modulator                             | Mtb killing through autophagy                                                       | Preclinical                       | Anti-convulsant (licensed)    | 2    |
| Statins                             | HMG-CoA reductase inhibitor                                                  | Intracellular killing of Mtb through increased phagolysosome fusion and autophagy ? | Preclinical                       | Lipid reducers (licensed)     | 3-6  |
| Fluoxetine                          | Selective serotonin reuptake inhibitor                                       | Mtb killing through autophagy                                                       | Preclinical                       | Antidepressant (licensed)     | 7    |
| Verapamil                           | Calcium channel blocker                                                      | Mtb killing through autophagy                                                       | Preclinical                       | Anti-arrhythmic (licensed)    | 8-10 |
| <b>Arachidonic acid pathway</b>     |                                                                              |                                                                                     |                                   |                               |      |
| Zileuton                            | 5-lipoxygenase inhibitor                                                     | Antimycobacterial activity through modulation of IL-1-PGE2-IFN I network            | Preclinical                       | Asthma (licensed)             | 11   |

|                                                     |                                         |                                                                         |             |                                         |       |
|-----------------------------------------------------|-----------------------------------------|-------------------------------------------------------------------------|-------------|-----------------------------------------|-------|
| Ibuprofen / Diclofenac                              | COX inhibitor reducing PGE2 synthesis   | Ameliorated inflammation and pathology                                  | Clinical    | Pain, fever (licensed)                  | 12-14 |
| Acetylsalicylic acid (Aspirin)                      | COX inhibitor reducing PGE2 synthesis   | Ameliorated inflammation and pathology                                  | Clinical    | Pain, fever (licensed)                  | 15-17 |
| <b>Glucocorticoids</b><br>Prednison / Dexamethasone | Broad anti-inflammatory effects         | Ameliorated / Exacerbated inflammation and pathology                    | Clinical    | Anti-inflammatory (licensed)            | 18-22 |
| <b>Kinase inhibitors</b><br>Imatinib                | Tyrosine kinase ABL-inhibitor           | Inhibition of Mtb engulfment and stimulation of phagosome acidification | Preclinical | Leukemia (licensed)                     | 23-25 |
| Gefitinib                                           | Tyrosine kinase inhibitor blocking EGFR | Antimycobacterial activity and stimulation of autophagy                 | Preclinical | Cancer (licensed)                       | 7     |
| <b>TNF-<math>\alpha</math></b><br>Cilostazol        | Phosphodiesterase 3 inhibitor           | Intracellular killing of Mtb through TNF- $\alpha$ modulation           | Preclinical | Claudication (licensed)                 | 26    |
| Sildenafil                                          | Phosphodiesterase 5 inhibitor           | Synergy with Cilostazol                                                 | Preclinical | Erectile dysfunction (licensed)         | 26    |
| Thalidomide derivates                               | Phosphodiesterase 4 inhibitor           | Intracellular killing of Mtb through TNF- $\alpha$ modulation           | Clinical    | Leprosy, cancer (licensed)              | 27-31 |
| Pentoxifylline                                      | Phosphodiesterase inhibitor             | Intracellular killing of Mtb through TNF- $\alpha$ modulation           | Preclinical | Claudication (licensed)                 | 32,33 |
| Desipramine                                         | Acid sphingomyelinase inhibitor         | Diminishes excessive TNF- $\alpha$ mediated tissue damage               | Preclinical | Antidepressant (licensed)               | 34    |
| Alisporivir                                         | Cyclophilin D inhibitor                 | Diminishes excessive TNF- $\alpha$ mediated tissue damage               | Preclinical | Hepatitis C (late stage clinical trial) | 34    |

|                                                                                                                                                          |                                                                                                                                                                                                        |                                                                                                                                                                                                                          |                                                              |                                                                                                                  |                                      |
|----------------------------------------------------------------------------------------------------------------------------------------------------------|--------------------------------------------------------------------------------------------------------------------------------------------------------------------------------------------------------|--------------------------------------------------------------------------------------------------------------------------------------------------------------------------------------------------------------------------|--------------------------------------------------------------|------------------------------------------------------------------------------------------------------------------|--------------------------------------|
| <p><b>Antibiotics</b><br/>TB drugs: Isoniazid, Pyrazinamide<br/><br/>Nitazoxanide<br/><br/>Doxycycline</p>                                               | <p>TB, chemotherapy<br/><br/>Antiparasitic drug with anti Mtb activity<br/><br/>Antibiotic</p>                                                                                                         | <p>Autophagy of Mtb infected macrophages<br/><br/>Autophagy<br/><br/>Inhibitor matrixmetalloproteases</p>                                                                                                                | <p>Preclinical<br/><br/>Preclinical<br/><br/>Preclinical</p> | <p>TB drugs (licensed)<br/><br/>Antiparasitic drug (licensed)<br/><br/>Antibiotic (licensed)</p>                 | <p>35,36<br/><br/>37<br/><br/>38</p> |
| <p><b>Nutraceutical and derivatives</b><br/>Vitamin D 3 / Phenylbutyrate<br/><br/>Vitamin A / All-trans-retinoic acid (ATRA)</p>                         | <p>Macrophage activation and antimicrobial peptide induction / Histone acetylase inhibitor<br/><br/>Antimicrobial and macrophage activation / Modulation of cell proliferation and differentiation</p> | <p>Intracellular killing of Mtb by stimulating cathelicidin (combination with vitamin D)<br/><br/>(Intracellular) Killing of Mtb / Block of MDSC resulting in improved antimycobacterial immunity</p>                    | <p>Clinical<br/><br/>Clinical / Preclinical</p>              | <p>Dietary supplement / Urea cycle disorder (licensed)<br/><br/>Dietary supplement / Acne, cancer (licensed)</p> | <p>39-48<br/><br/>49-55</p>          |
| <p><b>Cytokine</b><br/>Interferon-<math>\gamma</math></p>                                                                                                | <p>Macrophage activation</p>                                                                                                                                                                           | <p>Intracellular killing of Mtb</p>                                                                                                                                                                                      | <p>Clinical</p>                                              | <p>CGD/Osteopetrosis (licensed)</p>                                                                              | <p>56-59</p>                         |
| <p><b>Anti-cytokine</b><br/>Adalimumab, Infliximab (anti-TNF-<math>\alpha</math> mAb)<br/><br/>Etanercept (soluble TNF-<math>\alpha</math> receptor)</p> | <p>Blocking of TNF-<math>\alpha</math> to reduce excessive inflammation<br/><br/>Blocking of TNF-<math>\alpha</math> to reduce excessive inflammation</p>                                              | <p>Diminishes excessive TNF-<math>\alpha</math> mediated tissue damage / Lesion destabilization<br/><br/>Diminishes excessive TNF-<math>\alpha</math> mediated necrosis thereby increasing intracellular Mtb killing</p> | <p>Clinical<br/><br/>Clinical</p>                            | <p>Rheumatoid arthritis (licensed)<br/><br/>Rheumatoid arthritis (licensed)</p>                                  | <p>60-62<br/><br/>19</p>             |

|                                                                 |                                                                        |                                                                               |             |                                     |       |
|-----------------------------------------------------------------|------------------------------------------------------------------------|-------------------------------------------------------------------------------|-------------|-------------------------------------|-------|
| Siltuximab<br>(anti-IL-6 mAb)                                   | Blocking of IL-6 to reduce excessive inflammation                      | Ameliorated inflammation and pathology through IL-6 reduction notably in IRIS | Preclinical | Castleman disease (licensed)        | 63    |
| Tocilizumab<br>(anti-IL-6R mAb)                                 | Blocking of IL-6 to reduce excessive inflammation                      | Ameliorated inflammation and pathology through IL-6 reduction notably in IRIS | Preclinical | Rheumatoid arthritis (licensed)     | 63    |
| <b>Checkpoint control</b><br>Ipilimumab<br>(anti-CTLA4 mAb)     | Release from CTL-4 (primarily CD8 T cells) mediated checkpoint control | Improved T cell immunity                                                      | Preclinical | Cancer (licensed)                   | 64-66 |
| Nivolumab,<br>Pembrolizumab<br>(anti-PD-1 mAb)                  | Release from PD-1 (primarily CD4 T cells) mediated checkpoint control  | Improved T cell immunity                                                      | Preclinical | Cancer (licensed)                   | 67-71 |
| Anti-Tim3, mAb                                                  | Release from Tim3 mediated checkpoint control                          | Improved antimycobacterial immunity                                           | Preclinical | Cancer (preclinical)                | 72-74 |
| <b>Angiogenesis inhibitor</b><br>Bevacizumab<br>(anti VEGF mAb) | Angiogenesis inhibitor                                                 | Angiogenesis inhibition resulting in improved antimycobacterial activity      | Preclinical | Cancer (licensed)                   | 75-79 |
| Pazopanib                                                       | Tyrosine kinase inhibitor affecting angiogenesis by blocking VEGF      | Angiogenesis inhibition resulting in antimycobacterial activity               | Preclinical | Cancer (licensed)                   | 77    |
| <b>Cell therapy</b><br>Mesenchymal stroma cells (MSC)           | Diminish excessive inflammation                                        | T-cell reconstitution                                                         | Clinical    | Hyper-inflammation (clinical trial) | 80,81 |

## References

- 1 Singhal, A. *et al.* Metformin as adjunct antituberculosis therapy. *Sci. Transl. Med* **6**, 263ra159 (2014).
- 2 Schiebler, M. *et al.* Functional drug screening reveals anticonvulsants as enhancers of mTOR-independent autophagic killing of Mycobacterium tuberculosis through inositol depletion. *EMBO Mol. Med* **7**, 127-139 (2015).
- 3 Lai, C. C. *et al.* Statin treatment is associated with a decreased risk of active tuberculosis: an analysis of a nationally representative cohort. *Thorax* **71**, 646-651, doi:10.1136/thoraxjnl-2015-207052 (2016).
- 4 Dutta, N. K. *et al.* Statin adjunctive therapy shortens the duration of TB treatment in mice. *J Antimicrob Chemother* **71**, 1570-1577, doi:10.1093/jac/dkw014 (2016).
- 5 Lobato, L. S. *et al.* Statins Increase Rifampin Mycobactericidal Effect. *Antimicrob Agents Chemother* **58**, 5766-5774, doi:10.1128/aac.01826-13 (2014).
- 6 Parihar, S. P. *et al.* Statin therapy reduces the mycobacterium tuberculosis burden in human macrophages and in mice by enhancing autophagy and phagosome maturation. *J. Infect. Dis* **209**, 754-763 (2014).
- 7 Stanley, S. A. *et al.* Identification of Host-Targeted Small Molecules That Restrict Intracellular Mycobacterium tuberculosis Growth. *PLoS Pathog* **10**, doi:10.1371/journal.ppat.1003946 (2014).
- 8 Gupta, S. *et al.* Acceleration of tuberculosis treatment by adjunctive therapy with verapamil as an efflux inhibitor. *Am. J. Respir. Crit Care Med* **188**, 600-607 (2013).
- 9 Gupta, S. *et al.* Efflux inhibition with verapamil potentiates bedaquiline in Mycobacterium tuberculosis. *Antimicrob Agents Chemother* **58**, 574-576 (2014).
- 10 Gupta, S., Tyagi, S. & Bishai, W. R. Verapamil Increases the Bactericidal Activity of Bedaquiline against Mycobacterium tuberculosis in a Mouse Model. *Antimicrob Agents Chemother* **59**, 673-676, doi:10.1128/aac.04019-14 (2015).
- 11 Mayer-Barber, K. D. *et al.* Host-directed therapy of tuberculosis based on interleukin-1 and type I interferon crosstalk. *Nature* **511**, 99-103 (2014).
- 12 Dutta, N. K., Asok Kurnar, K., Mazumdar, K. & Dastidar, S. G. In vitro and in vivo antimycobacterial activity of antiinflammatory drug, diclofenac sodium. *Indian J Exp Biol* **42**, 922-927 (2004).
- 13 Dutta, N. K., Mazumdar, K., Dastidar, S. G. & Park, J. H. Activity of diclofenac used alone and in combination with streptomycin against Mycobacterium tuberculosis in mice. *Int J Antimicrob Agents* **30**, 336-340, doi:10.1016/j.ijantimicag.2007.04.016 (2007).
- 14 Vilaplana, C. *et al.* Ibuprofen therapy resulted in significantly decreased tissue bacillary loads and increased survival in a new murine experimental model of active tuberculosis. *J. Infect. Dis* **208**, 199-202 (2013).
- 15 Byrne, S. T., Denkin, S. M. & Zhang, Y. Aspirin and ibuprofen enhance pyrazinamide treatment of murine tuberculosis. *J Antimicrob Chemother* **59**, 313-316, doi:10.1093/jac/dkl486 (2007).
- 16 Misra, U. K., Kalita, J. & Nair, P. P. Role of aspirin in tuberculous meningitis: A randomized open label placebo controlled trial. *J Neurol Sci* **293**, 12-17, doi:10.1016/j.jns.2010.03.025 (2010).
- 17 Schoeman, J. F., van Rensburg, A. J., Laubscher, J. A. & Springer, P. The Role of Aspirin in Childhood Tuberculous Meningitis. *J Child Neurol* **26**, 956-962, doi:10.1177/0883073811398132 (2011).
- 18 Mayanja-Kizza, H. *et al.* Immunoadjuvant prednisolone therapy for HIV-associated tuberculosis: a phase 2 clinical trial in Uganda. *J Infect Dis* **191**, 856-865, doi:10.1086/427995 (2005).
- 19 Wallis, R. S. *et al.* A study of the safety, immunology, virology, and microbiology of adjunctive etanercept in HIV-1-associated tuberculosis. *AIDS (London, England)* **18**, 257-264, doi:10.1097/01.aids.0000104367.21567.d8 (2004).
- 20 Critchley, J. A., Young, F., Orton, L. & Garner, P. Corticosteroids for prevention of mortality in people with tuberculosis: a systematic review and meta-analysis. *Lancet Infect Dis* **13**, 223-237, doi:10.1016/s1473-3099(12)70321-3 (2013).
- 21 Tobin, D. M. *et al.* Host genotype-specific therapies can optimize the inflammatory response to mycobacterial infections. *Cell* **148**, 434-446 (2012).

- 22 Wallis, R. S. Corticosteroid effects on sputum culture in pulmonary tuberculosis: a meta-regression analysis. *Open Forum Infect Dis* **1**, ofu020, doi:10.1093/ofid/ofu020 (2014).
- 23 Bruns, H. *et al.* Abelson Tyrosine Kinase Controls Phagosomal Acidification Required for Killing of Mycobacterium tuberculosis in Human Macrophages. *J Immunol* **189**, 4069-4078, doi:10.4049/jimmunol.1201538 (2012).
- 24 Napier, R. J. *et al.* Low doses of imatinib induce myelopoiesis and enhance host anti-microbial immunity. *PLoS Pathog* **11**, e1004770 (2015).
- 25 Napier, R. J. *et al.* Imatinib-Sensitive Tyrosine Kinases Regulate Mycobacterial Pathogenesis and Represent Therapeutic Targets against Tuberculosis. *Cell Host Microbe* **10**, 475-485, doi:10.1016/j.chom.2011.09.010 (2011).
- 26 Maiga, M. *et al.* Adjuvant host-directed therapy with types 3 and 5 but not type 4 phosphodiesterase inhibitors shortens the duration of tuberculosis treatment. *J. Infect. Dis* **208**, 512-519 (2013).
- 27 Koo, M. S. *et al.* Phosphodiesterase 4 inhibition reduces innate immunity and improves isoniazid clearance of Mycobacterium tuberculosis in the lungs of infected mice. *PLoS. ONE* **6**, e17091 (2011).
- 28 Subbian, S. *et al.* Phosphodiesterase-4 inhibition combined with isoniazid treatment of rabbits with pulmonary tuberculosis reduces macrophage activation and lung pathology. *Am. J. Pathol* **179**, 289-301 (2011).
- 29 Subbian, S. *et al.* Phosphodiesterase-4 Inhibition Alters Gene Expression and Improves Isoniazid - Mediated Clearance of Mycobacterium tuberculosis in Rabbit Lungs. *PLoS Pathog* **7**, doi:10.1371/journal.ppat.1002262 (2011).
- 30 Subbian, S. *et al.* Pharmacologic Inhibition of Host Phosphodiesterase-4 Improves Isoniazid-Mediated Clearance of Mycobacterium tuberculosis. *Front Immunol* **7**, 238 (2016).
- 31 Subbian, S. *et al.* Adjunctive Phosphodiesterase-4 Inhibitor Therapy Improves Antibiotic Response to Pulmonary Tuberculosis in a Rabbit Model. *Ebiomedicine* **4**, 104-114, doi:10.1016/j.ebiom.2016.01.015 (2016).
- 32 Turner, J., Frank, A. A., Brooks, J. V., Marietta, P. M. & Orme, I. M. Pentoxifylline treatment of mice with chronic pulmonary tuberculosis accelerates the development of destructive pathology. *Immunology* **102**, 248-253 (2001).
- 33 Wallis, R. S. *et al.* Pentoxifylline therapy in human immunodeficiency virus-seropositive persons with tuberculosis: a randomized, controlled trial. *J Infect Dis* **174**, 727-733 (1996).
- 34 Roca, F. J. & Ramakrishnan, L. TNF dually mediates resistance and susceptibility to mycobacteria via mitochondrial reactive oxygen species. *Cell* **153**, 521-534 (2013).
- 35 Kim, J. J. *et al.* Host cell autophagy activated by antibiotics is required for their effective antimycobacterial drug action. *Cell Host Microbe* **11**, 457-468, doi:10.1016/j.chom.2012.03.008 (2012).
- 36 Manca, C. *et al.* Host targeted activity of pyrazinamide in Mycobacterium tuberculosis infection. *PLoS one* **8**, e74082, doi:10.1371/journal.pone.0074082 (2013).
- 37 Lam, K. K. *et al.* Nitazoxanide stimulates autophagy and inhibits mTORC1 signaling and intracellular proliferation of Mycobacterium tuberculosis. *PLoS Pathog* **8**, e1002691, doi:10.1371/journal.ppat.1002691 (2012).
- 38 Walker, N. F. *et al.* Doxycycline and HIV Infection Suppress Tuberculosis-induced Matrix Metalloproteinases. *Am J Respir Crit Care* **185**, 989-997, doi:10.1164/rccm.201110-1769OC (2012).
- 39 van der Does, A. M., Kenne, E., Koppelaar, E., Agerberth, B. & Lindbom, L. Vitamin D-3 and phenylbutyrate promote development of a human dendritic cell subset displaying enhanced antimicrobial properties. *J Leukoc Biol* **95**, 883-891, doi:10.1189/jlb.1013549 (2014).
- 40 Crowle, A. J., Ross, E. J. & May, M. H. Inhibition by 1,25(OH)<sub>2</sub>-vitamin-D<sub>3</sub> of the multiplication of virulent tubercle-bacilli in cultured human macrophages. *Infect Immun* **55**, 2945-2950 (1987).
- 41 Rook, G. A. W. *et al.* Vitamin-D<sub>3</sub>, gamma-interferon, and control of proliferation of mycobacterium-tuberculosis by human-monocytes. *Immunology* **57**, 159-163 (1986).
- 42 Coussens, A. K., Wilkinson, R. J. & Martineau, A. R. Phenylbutyrate Is Bacteriostatic against Mycobacterium tuberculosis and Regulates the Macrophage Response to Infection, Synergistically with 25-Hydroxy-Vitamin D<sub>3</sub>. *PLoS. Pathog* **11**, e1005007 (2015).
- 43 Daley, P. *et al.* Adjunctive vitamin D for treatment of active tuberculosis in India: a randomised, double-blind, placebo-controlled trial. *Lancet Infect. Dis* **15**, 528-534 (2015).

- 44 Liu, P. T., Stenger, S., Tang, D. H. & Modlin, R. L. Cutting edge: Vitamin D-mediated human antimicrobial activity against *Mycobacterium tuberculosis* is dependent on the induction of cathelicidin. *J Immunol* **179**, 2060-2063 (2007).
- 45 Martineau, A. R. *et al.* High-dose vitamin D-3 during intensive-phase antimicrobial treatment of pulmonary tuberculosis: a double-blind randomised controlled trial. *Lancet* **377**, 242-250, doi:10.1016/s0140-6736(10)61889-2 (2011).
- 46 Mily, A. *et al.* Significant Effects of Oral Phenylbutyrate and Vitamin D3 Adjunctive Therapy in Pulmonary Tuberculosis: A Randomized Controlled Trial. *PLoS ONE* **10**, e0138340 (2015).
- 47 Salahuddin, N. *et al.* Vitamin D accelerates clinical recovery from tuberculosis: results of the SUCCINCT Study Supplementary Cholecalciferol in recovery from tuberculosis . A randomized, placebo-controlled, clinical trial of vitamin D supplementation in patients with pulmonary tuberculosis'. *BMS Infect Diss* **13**, doi:10.1186/1471-2334-13-22 (2013).
- 48 Tukvadze, N. *et al.* High-dose vitamin D-3 in adults with pulmonary tuberculosis: a double-blind randomized controlled trial. *Am J Clin Nutr* **102**, 1059-1069, doi:10.3945/ajcn.115.113886 (2015).
- 49 Crowle, A. J. & Ross, E. J. Inhibition by retinoic acid of multiplication of virulent tubercle-bacilli in cultured human macrophages. *Infect Immun* **57**, 840-844 (1989).
- 50 Greenstein, R. J. *et al.* Unanticipated *Mycobacterium tuberculosis* complex culture inhibition by immune modulators, immune suppressants, a growth enhancer, and vitamins A and D: clinical implications. *Int J Infet Dis* **26**, 37-43, doi:10.1016/j.ijid.2014.01.026 (2014).
- 51 Knaul, J. K. *et al.* Lung-Residing Myeloid-derived Suppressors Display Dual Functionality in Murine Pulmonary Tuberculosis. *Am J Respir Crit Care Med* **190**, 1053-1066, doi:10.1164/rccm.201405-0828OC (2014).
- 52 Lawson, L. *et al.* Randomized controlled trial of zinc and vitamin A as co-adjuvants for the treatment of pulmonary tuberculosis. *Trop Med Int Health Trop* **15**, 1481-1490, doi:10.1111/j.1365-3156.2010.02638.x (2010).
- 53 Visser, M. E. *et al.* The effect of vitamin A and zinc supplementation on treatment outcomes in pulmonary tuberculosis: a randomized controlled trial. *Am J Clin Nutr* **93**, 93-100, doi:10.3945/ajcn.110.001784 (2011).
- 54 Wheelwright, M. *et al.* All-Trans Retinoic Acid-Triggered Antimicrobial Activity against *Mycobacterium tuberculosis* Is Dependent on NPC2. *J Immunol* **192**, 2280-2290, doi:10.4049/jimmunol.1301686 (2014).
- 55 Yamada, H., Mizuno, S., Ross, A. C. & Sugawara, I. Retinoic acid therapy attenuates the severity of tuberculosis while altering lymphocyte and macrophage numbers and cytokine expression in rats infected with *Mycobacterium tuberculosis*. *J Nutr* **137**, 2696-2700 (2007).
- 56 Condos, R., Rom, W. N. & Schluger, N. W. Treatment of multidrug-resistant pulmonary tuberculosis with interferon-gamma via aerosol. *Lancet* **349**, 1513-1515, doi:10.1016/s0140-6736(96)12273-x (1997).
- 57 Dawson, R. *et al.* Immunomodulation with Recombinant Interferon-gamma 1b in Pulmonary Tuberculosis. *PLoS one* **4**, doi:10.1371/journal.pone.0006984 (2009).
- 58 Koh, W. J. *et al.* Six-month therapy with aerosolized interferon-gamma for refractory multidrug-resistant pulmonary tuberculosis. *J Korean Med Sci* **19**, 167-171 (2004).
- 59 Suarez-Mendez, R. *et al.* Adjuvant interferon gamma in patients with drug-resistant pulmonary tuberculosis: a pilot study. *BMC Infect Dis* **4**, doi:10.1186/1471-2334-4-44 (2004).
- 60 Blackmore, T. K., Manning, L., Taylor, W. J. & Wallis, R. S. Therapeutic Use of Infliximab in Tuberculosis to Control Severe Paradoxical Reaction of the Brain and Lymph Nodes. *Clin Infect Dis* **47**, E83-E85, doi:10.1086/592695 (2008).
- 61 Wallis, R. S., van, V. C. & Potgieter, S. Adalimumab treatment of life-threatening tuberculosis. *Clin Infect Dis* **48**, 1429-1432 (2009).
- 62 Jorge, J. H., Graciela, C., Pablo, A. P. & Luis, S. H. J. A Life-Threatening Central Nervous System-Tuberculosis Inflammatory Reaction Nonresponsive to Corticosteroids and Successfully Controlled by Infliximab in a Young Patient With a Variant of Juvenile Idiopathic Arthritis. *J Clin Rheumatol* **18**, 189-191, doi:10.1097/RHU.0b013e318258b725 (2012).
- 63 Okada, M. *et al.* Anti-IL-6 Receptor Antibody Causes Less Promotion of Tuberculosis Infection than Anti-TNF-alpha Antibody in Mice. *Clin Dev Immunol*, doi:10.1155/2011/404929 (2011).

- 64 Garcia Jacobo, R. E. *et al.* Analysis of Th1, Th17 and regulatory T cells in tuberculosis case contacts. *Cell Immunol* **289**, 167-173, doi:10.1016/j.cellimm.2014.03.010 (2014).
- 65 Li, N. *et al.* Enrichment of regulatory T-cells in blood of patients with multidrug-resistant tuberculosis. *Int J Tuberc Lung Dis* **19**, 1230-1238, doi:10.5588/ijtld.15.0148 (2015).
- 66 Saharia, K. K. *et al.* Tuberculosis Therapy Modifies the Cytokine Profile, Maturation State, and Expression of Inhibitory Molecules on Mycobacterium tuberculosis-Specific CD4+ T-Cells. *PLoS one* **11**, e0158262, doi:10.1371/journal.pone.0158262 (2016).
- 67 Jurado, J. O. *et al.* Programmed death (PD)-1:PD-ligand 1/PD-ligand 2 pathway inhibits T cell effector functions during human tuberculosis. *J Immunol (Baltimore, Md. : 1950)* **181**, 116-125 (2008).
- 68 Barber, D. L., Mayer-Barber, K. D., Feng, C. G., Sharpe, A. H. & Sher, A. CD4 T cells promote rather than control tuberculosis in the absence of PD-1-mediated inhibition. *J Immunol (Baltimore, Md. : 1950)* **186**, 1598-1607, doi:10.4049/jimmunol.1003304 (2011).
- 69 Sakai, S. *et al.* CD4 T Cell-Derived IFN-gamma Plays a Minimal Role in Control of Pulmonary Mycobacterium tuberculosis Infection and Must Be Actively Repressed by PD-1 to Prevent Lethal Disease. *PLoS Pathog* **12**, e1005667, doi:10.1371/journal.ppat.1005667 (2016).
- 70 Lee, J. J., Chan, A. & Tang, T. Tuberculosis reactivation in a patient receiving anti-programmed death-1 (PD-1) inhibitor for relapsed Hodgkin's lymphoma. *Acta Oncol (Stockholm, Sweden)* **55**, 519-520, doi:10.3109/0284186x.2015.1125017 (2016).
- 71 Singh, A., Mohan, A., Dey, A. B. & Mitra, D. K. Inhibiting the programmed death 1 pathway rescues Mycobacterium tuberculosis-specific interferon gamma-producing T cells from apoptosis in patients with pulmonary tuberculosis. *J Infect Dis* **208**, 603-615, doi:10.1093/infdis/jit206 (2013).
- 72 Jayaraman, P. *et al.* TIM3 Mediates T Cell Exhaustion during Mycobacterium tuberculosis Infection. *PLoS Pathog* **12**, e1005490, doi:10.1371/journal.ppat.1005490 (2016).
- 73 Sada-Ovalle, I. *et al.* The Tim3-galectin 9 pathway induces antibacterial activity in human macrophages infected with Mycobacterium tuberculosis. *J Immunol (Baltimore, Md. : 1950)* **189**, 5896-5902, doi:10.4049/jimmunol.1200990 (2012).
- 74 Sada-Ovalle, I. *et al.* Tim-3 blocking rescue macrophage and T cell function against Mycobacterium tuberculosis infection in HIV+ patients. *J Int AIDS Soc* **18**, 20078, doi:10.7448/ias.18.1.20078 (2015).
- 75 Datta, M. *et al.* Anti-vascular endothelial growth factor treatment normalizes tuberculosis granuloma vasculature and improves small molecule delivery. *Proc. Natl. Acad. Sci. U. S. A* **112**, 1827-1832 (2015).
- 76 Lin, C. C., Wang, J. Y. & Pu, Y. S. Active Tuberculosis During Temsirolimus and Bevacizumab Treatment. *J Clin Oncol* **31**, E18-E20, doi:10.1200/jco.2012.43.7566 (2013).
- 77 Oehlers, S. H. *et al.* Interception of host angiogenic signalling limits mycobacterial growth. *Nature* **517**, 612-615 (2015).
- 78 Polena, H. *et al.* Mycobacterium tuberculosis exploits the formation of new blood vessels for its dissemination. *Sci Rep* **6**, 33162, doi:10.1038/srep33162 (2016).
- 79 Zheng, X. W. *et al.* Subcutaneous tuberculosis formation during FOLFIRI and bevacizumab treatment: a case report. *Int J Colorectal Dis* **31**, 943-944, doi:10.1007/s00384-015-2368-6 (2016).
- 80 Skrahin, A. *et al.* Autologous mesenchymal stromal cell infusion as adjunct treatment in patients with multidrug and extensively drug-resistant tuberculosis: an open-label phase 1 safety trial. *Lancet Respir Med* **2**, 108-122, doi:10.1016/s2213-2600(13)70234-0 (2014).
- 81 Skrahin, A. *et al.* Effectiveness of a novel cellular therapy to treat multidrug-resistant tuberculosis. *J Clin Tuberc Other Mycobact Dis* **4**, 21-27, doi:10.1016/j.jctube.2016.05.003 (2016).
