# Supplementary material
Source: PubMed Central journal article supplement (PMC7097079)
Supplement: 41573_2018_BFnrd2017162_MOESM126_ESM.pdf [file 41573_2018_BFnrd2017162_MOESM126_ESM.pdf]

**Supplementary Table 3. Immunomodulatory agents in active clinical trials in sepsis**

| <b>Agent</b>                         | <b>Immunologic Effects</b>                                                                                                                                                                                                   | <b>Phase</b> | <b>National Clinical Trial #</b>                          | <b>Endpoints</b>                                                                                    |
|--------------------------------------|------------------------------------------------------------------------------------------------------------------------------------------------------------------------------------------------------------------------------|--------------|-----------------------------------------------------------|-----------------------------------------------------------------------------------------------------|
| <b>GM-CSF</b>                        | Increases myelopoiesis<br>Activates monocytic or macrophage population-producing inflammatory cytokines and adhesion molecules<br>Increases HLA-DR expression on antigen-presenting cells                                    | Phase III    | NCT02361528                                               | Incidence of ICU-acquired infection<br>Effect on monocyte HLA-DR                                    |
| <b>IFN-<math>\gamma</math></b>       | Increases monocyte expression of inflammatory cytokines<br>Increases HLA-DR expression on antigen-presenting cells<br>Increases macrophage activity                                                                          | Phase III    | NCT01649921                                               | LPS stimulated TNF- $\alpha$ ,<br>Incidence of secondary infections,<br>Organ function              |
| <b>Thymosin-<math>\alpha</math>1</b> | Increases CD4+ T cell and NK cell numbers<br>Augments T cell function<br>Increases HLA-DR expression on antigen-presenting cells<br>Enhances antiviral activity                                                              | Phase II/III | Starting in near future<br>(Previous trial # NCT00711620) | Mortality<br>Incidence of secondary infections                                                      |
| <b>IL-7</b>                          | Blocks T cell apoptosis<br>Restores T cell function<br>Increases IFN- $\gamma$ which activates innate immune system<br>Increases lymphoid trafficking to infected sites<br>Increases T cell proliferation                    | Phase II     | NCT02803346<br>NCT02797431<br>NCT02640807                 | Safety<br>Increase in absolute lymphocyte count,<br>Mortality<br>Incidence of nosocomial infections |
| <b><math>\alpha</math>-PD-L1</b>     | Releases checkpoint inhibition<br>Prevents T cell exhaustion<br>Reduces T cell apoptosis<br>Modulates myeloid cell interactions with the endothelium<br>Potentially alters macrophage and neutrophil antimicrobial functions | Phase Ib/IIa | NCT02576457                                               | Safety<br>Tolerability<br>Pharmacokinetics<br>Pharmacodynamics                                      |
